# Supplementary material for: Blockade of SARS-CoV-2 spike protein-mediated cell–cell fusion using COVID-19 convalescent plasma
Source: PubMed Central journal article supplement (PMC7946952; doi:10.1038/s41598-021-84840-3), 2021-03-10
Supplement: 41598_2021_84840_MOESM1_ESM.pdf [file 41598_2021_84840_MOESM1_ESM.pdf]

### convalescent plasma

Ling Wang<sup>1,2</sup>, Juan Zhao<sup>1,2</sup>, Lam N.T. Nguyen<sup>1,2</sup>, James L. Adkins<sup>1</sup>, Madison Schank<sup>1,2</sup>, Sushant Khanal<sup>1,2</sup>, Lam N. Nguyen<sup>1,2</sup>, Xindi Dang<sup>1,2</sup>, Dechao Cao<sup>1,2</sup>, Bal Krishna Chand Thakuri<sup>1,2</sup>, Zeyuan Lu<sup>1</sup>, Jinyu Zhang<sup>1,2</sup>, Yi Zhang<sup>1</sup>, Xiao Y. Wu<sup>1,2</sup>, Mohamed El Gazzar<sup>1,2</sup>, Shunbin Ning<sup>1,2</sup>, Jonathan P. Moorman<sup>1,2,3</sup>, and \*\*Zhi Q. Yao<sup>1,2,3</sup>

<sup>1</sup>Center of Excellence for Inflammation, Infectious Disease and Immunity, James H. Quillen College of Medicine, East Tennessee State University, Johnson City, Tennessee 37614

<sup>2</sup>Division of Infectious, Inflammatory and Immunologic Diseases, Department of Internal Medicine, Quillen College of Medicine, ETSU, Johnson City, Tennessee 37614

<sup>3</sup>Hepatitis (HCV/HBV/HIV) Program, James H. Quillen VA Medical Center, Department of Veterans Affairs, Johnson City, Tennessee 37614

Running title: COVID-19 convalescent plasma blocking cell-cell fusion

\*\*Corresponding author: Zhi Q. Yao, M.D., Ph.D.

Director, Center of Excellence for HIV/AIDS Care,

Quillen College of Medicine, East Tennessee State University,

Johnson City, TN 37614

Tel: 423-439-8029; Fax: 423-439-7010; E-mail: [yao@etsu.edu](mailto:yao@etsu.edu)

# Supplementary Figure S1

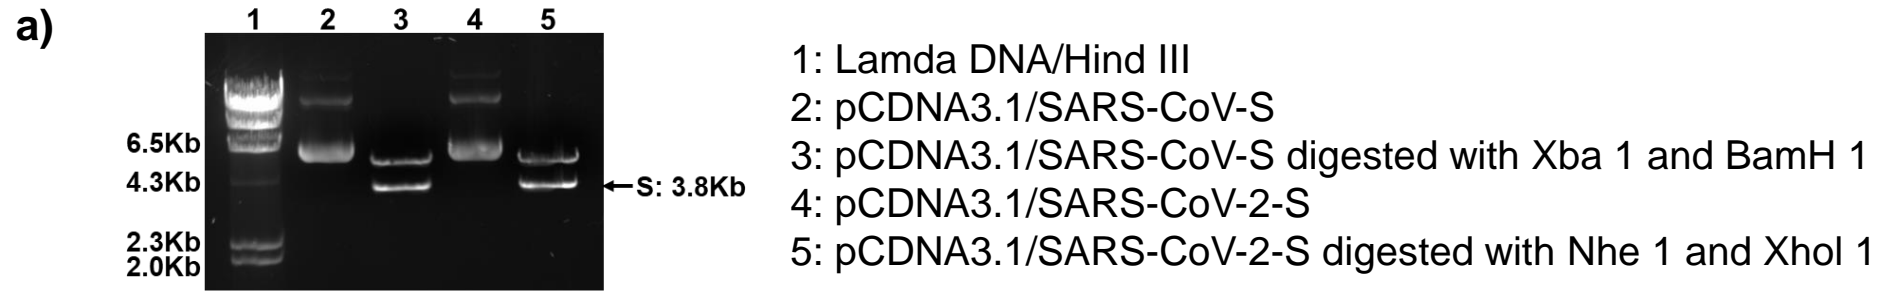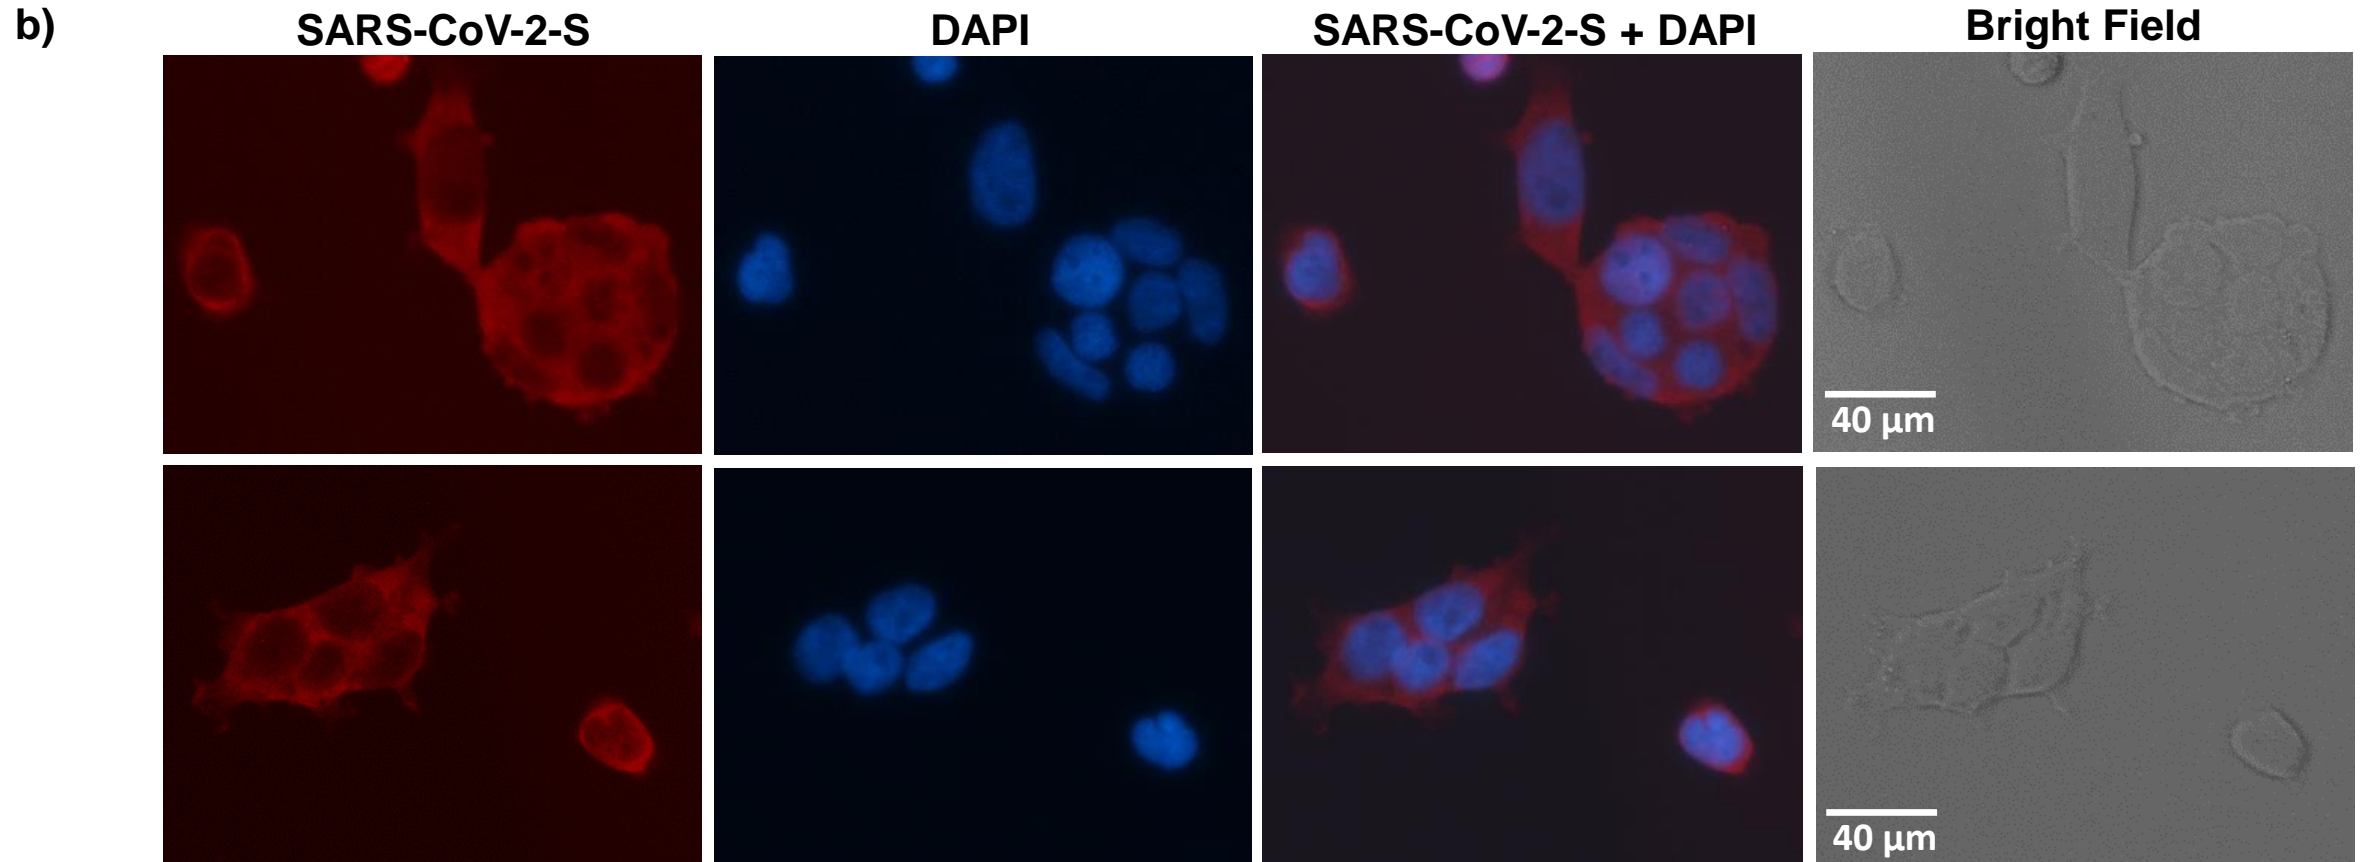

# Supplementary Figure S2

a)

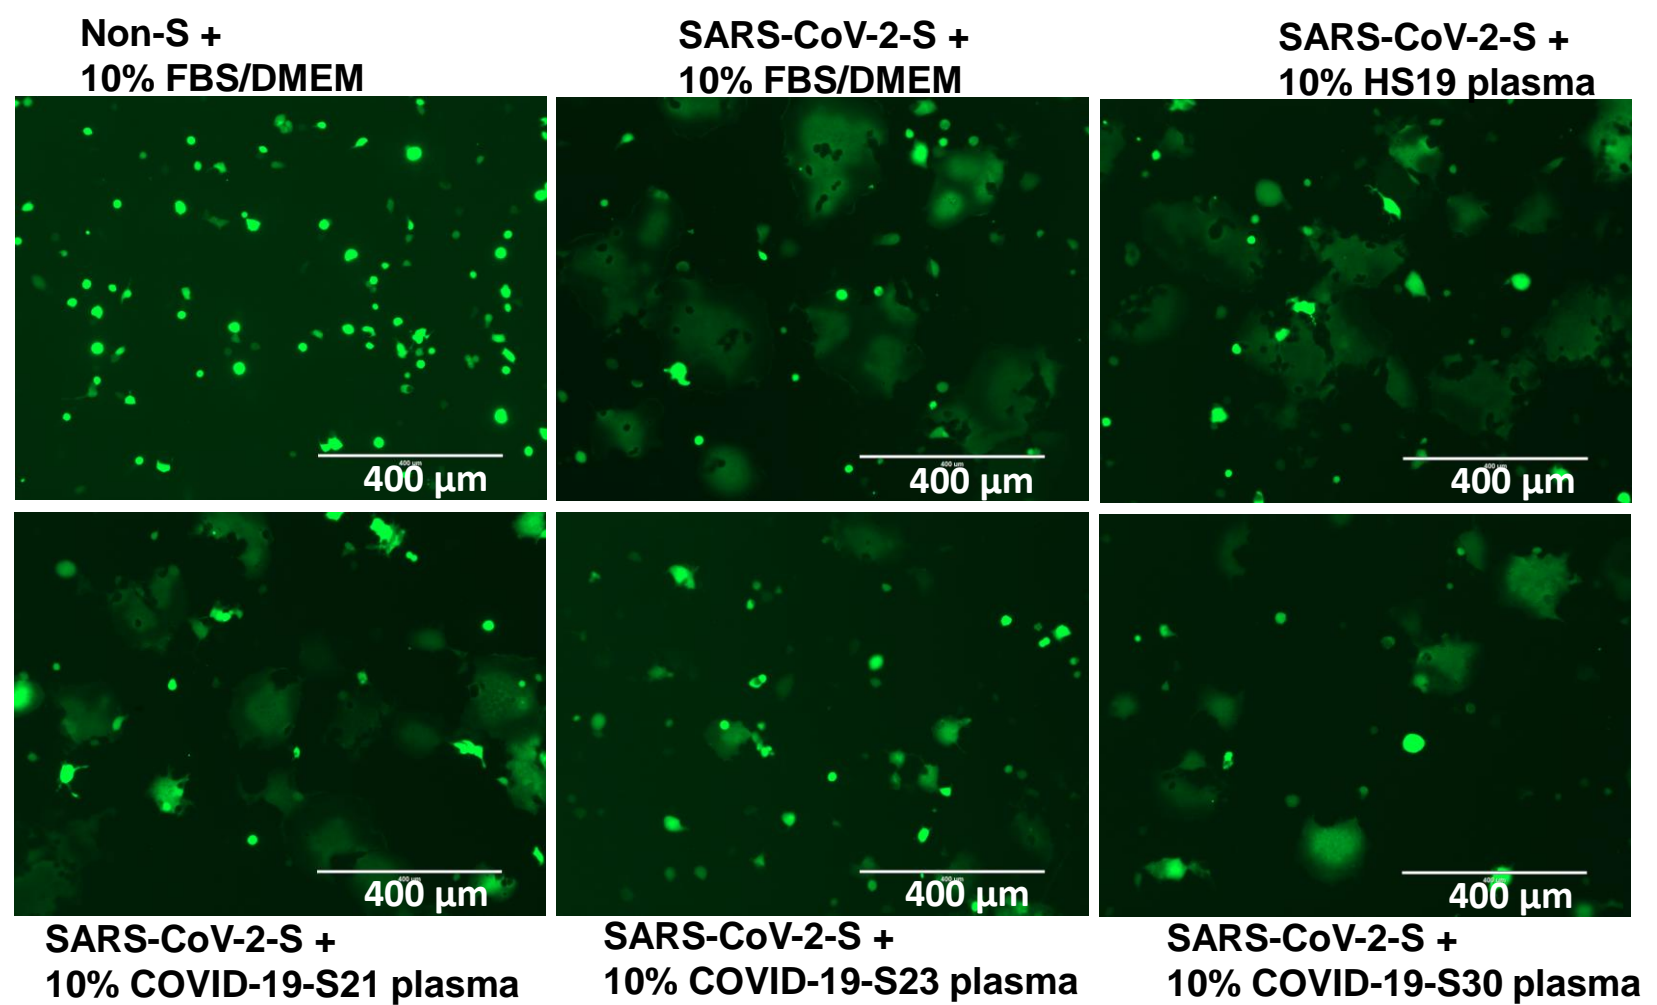

b)

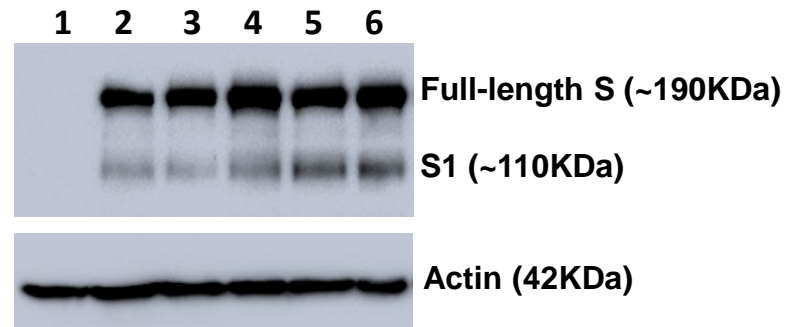

- 1: 293T transfected with GFP plasmid + 293T/ACE2 cells
- 2: 293T transfected with GFP and pCDNA3.1-SARS2-S plasmids + 293T/ACE2 cells
- 3: 293T transfected with GFP and pCDNA3.1-SARS2-S plasmids + 293T/ACE2 cells + 10% HS19 plasma
- 4: 293T transfected with GFP and pCDNA3.1-SARS2-S plasmids + 293T/ACE2 cells + 10% S21 plasma
- 5: 293T transfected with GFP and pCDNA3.1-SARS2-S plasmids + 293T/ACE2 cells + 10% S23 plasma
- 6: 293T transfected with GFP and pCDNA3.1-SARS2-S plasmids + 293T/ACE2 cells + 10% S30 plasma

**Supplementary  
Figure S3**

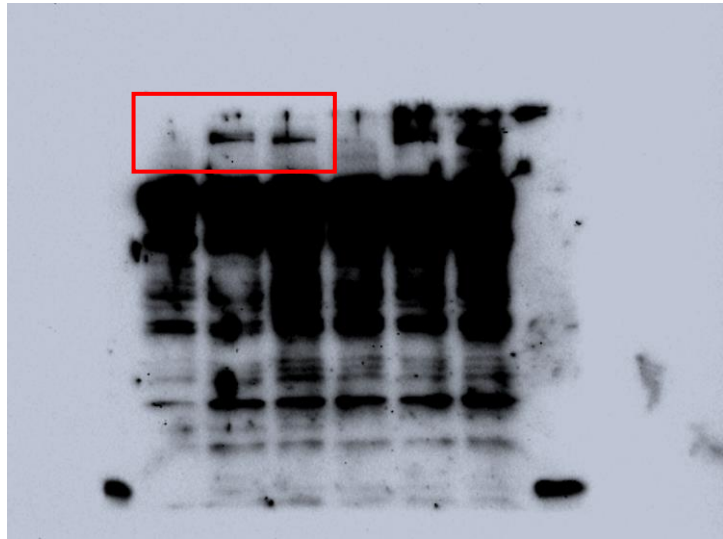

Fig. 2a: C9-S

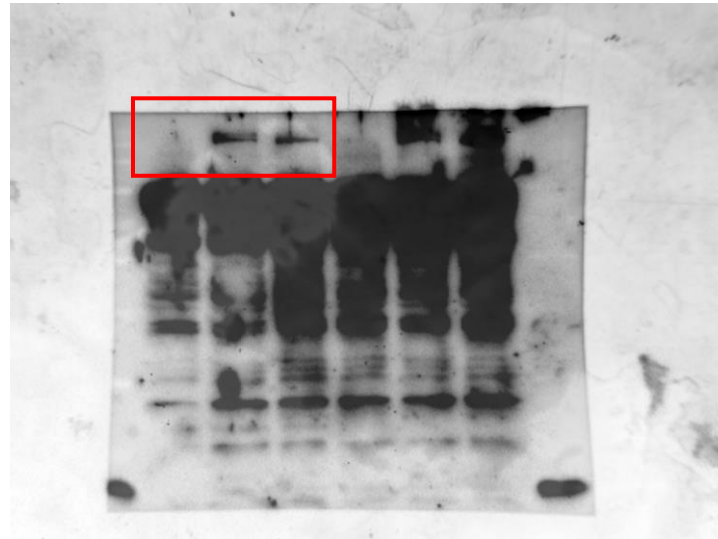

Fig. 2a: C9-S  
Merged with Bright Field Image

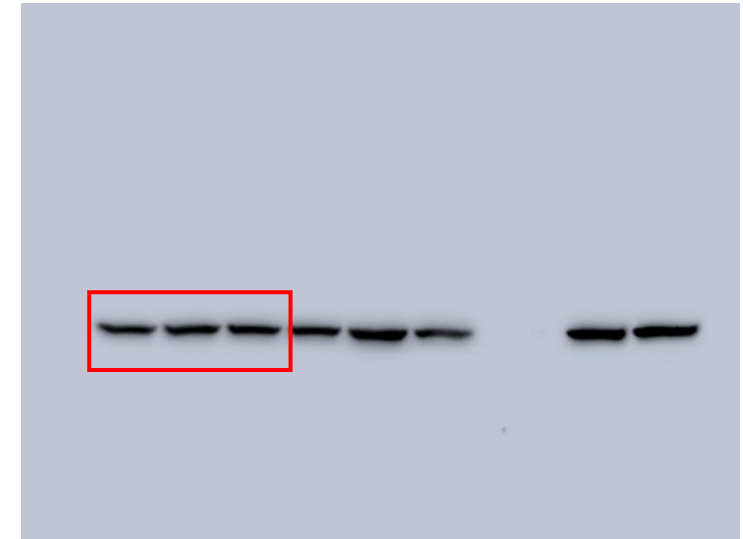

Fig. 2a: Actin

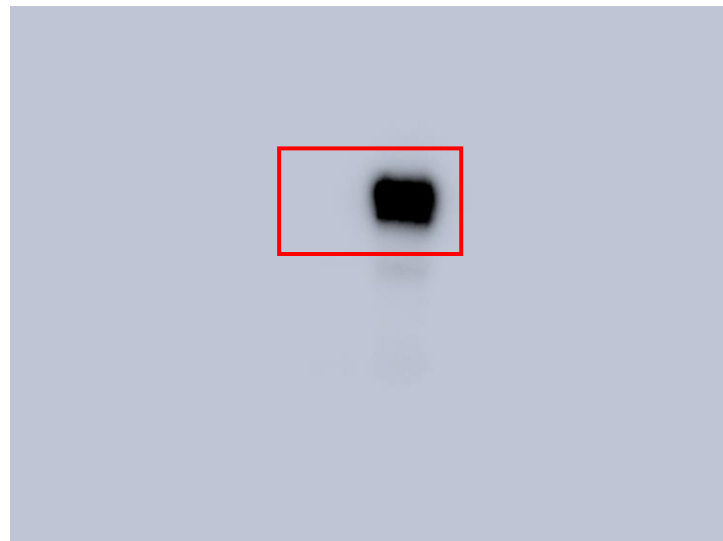

Fig. 2b: Myc-ACE2

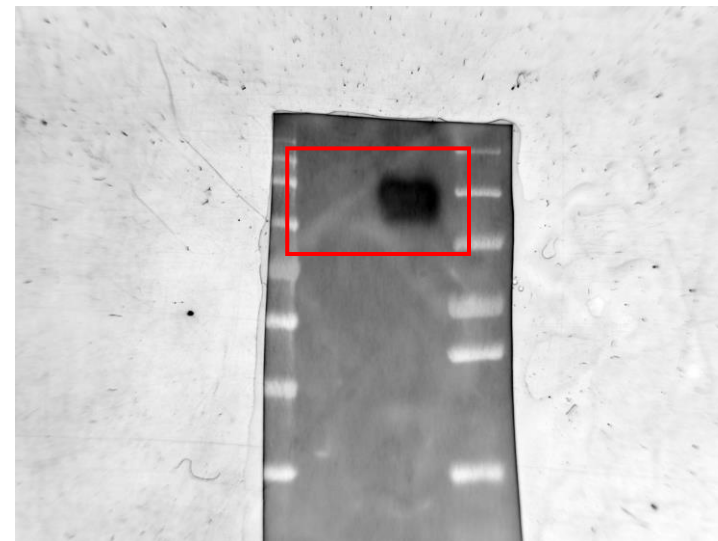

Fig. 2b: Myc-ACE2  
Merged with Bright Field Image

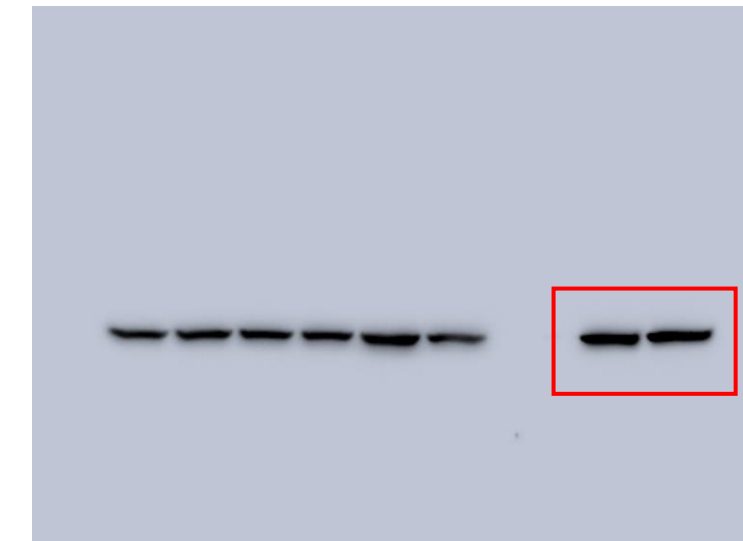

Fig. 2b: Actin

# Supplementary Figure S4

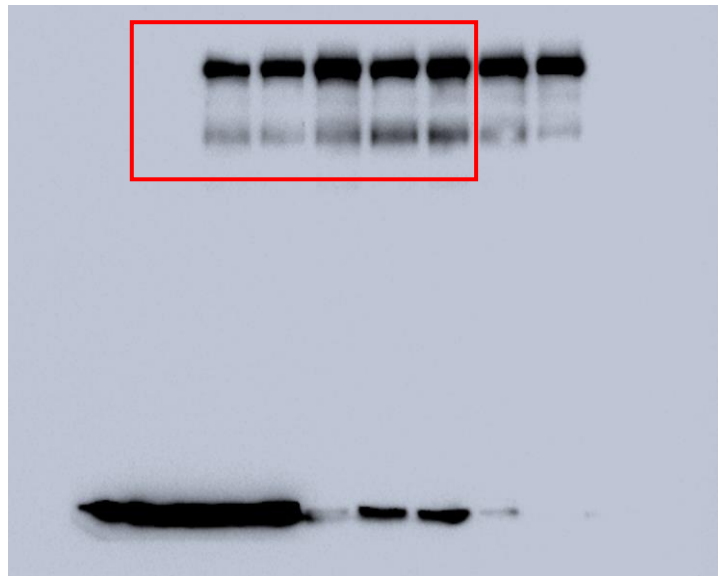

Fig. S2b: Full-length S and S1

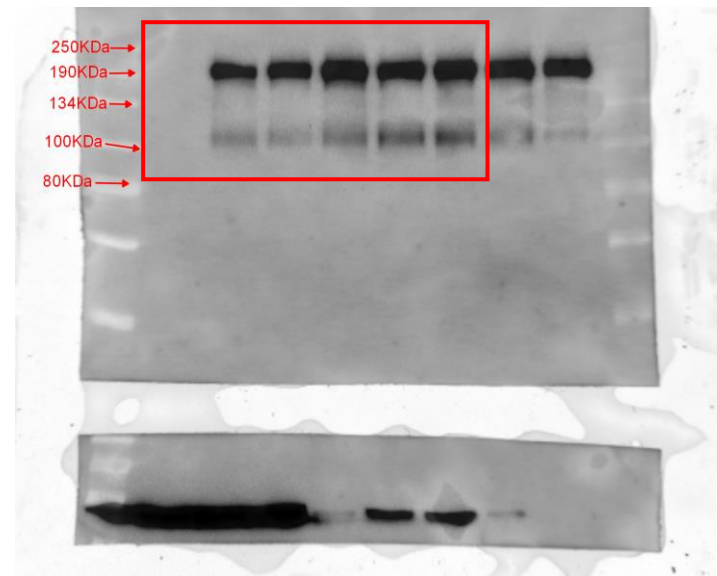

Fig. S2b: Full-length S and S1  
Merged with Bright Field Image

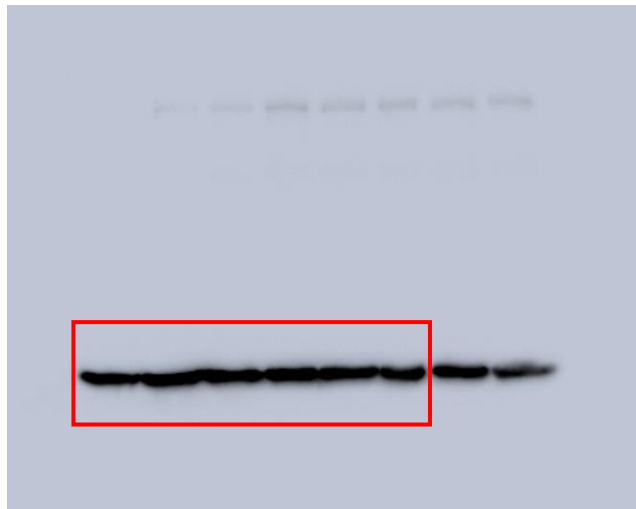

Fig. S2b: Actin

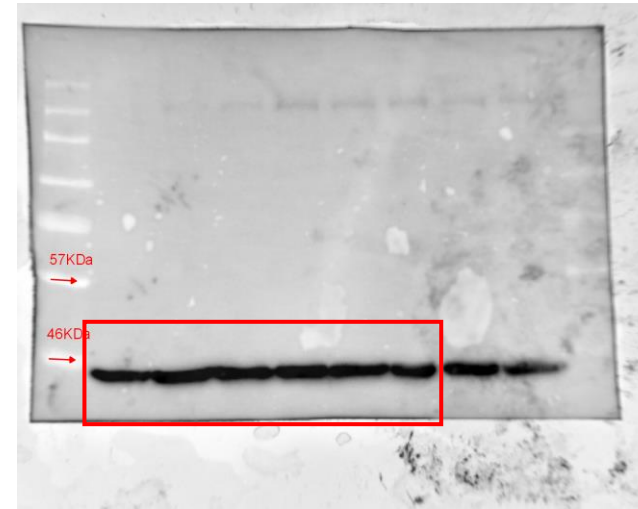

Fig. S2b: Actin  
Merged with Bright Field Image

## Supplementary Figure Legends

**Figure S1. a)** Restriction enzyme digestion of SARS-CoV-2-S and SARS-CoV-S plasmids. **b)** Immunofluorescence assays to check SARS-CoV-2-S expression on cell surface.

**Figure S2. a)** The COVID-19 convalescent plasma with high titers of NAbs blocks SARS-CoV-2-S-mediated cell-cell fusions. **b)** Western blot analysis of expression of full-length S protein and S1 protein (Cleaved band). The two blot images were cropped from the same gel.

**Figure S3.** Original Western blot images for **Figure 2a** and **2b**. The images for **Figure 2a-actin** and **Figure 2b-actin** were from one same original full-length membrane. Because there were very dominant actin bands without any other nonspecific bands on the membrane, we did not capture bright field image for the membrane.

**Figure S4.** Original Western blot images for **Figure S2b**.
